# Supplementary material for: Transcription Factors Mat2 and Znf2 Operate Cellular Circuits Orchestrating Opposite- and Same-Sex Mating in Cryptococcus neoformans
Source: PLoS Genet. 2010 May 13;6(5):e1000953. doi: 10.1371/journal.pgen.1000953 (PMC2869318; doi:10.1371/journal.pgen.1000953)
Supplement: Table S3 — Genes differentially expressed during monokaryotic fruiting in ste7Δ, mat2Δ, and znf2Δ mutants in the XL280α background. (0.04 MB XLS) [file pgen.1000953.s008.xls]

## Sheet: ste7
note: highlighted genes were also identified as differentially expressed genes in the ste7 mutants in JEC21 background during bilateral mating
ID	Ln (ste7/WT) -3	comments
163.m06347, BCGP1-A4, 163.m06343, BCGP1-A5, BCGP1-A6	-7.53	MFalpha
163.m06349, BCGP1-A19, BCGP1-A20, BCGP1-A21, BCGP1-A22, 1662.seq.055	-3.07983	STE3alpha
179.m00072	-3.7266	conserved hypothetical
163.m06426	-3.56609	PRY2,may be involved in cell wall organization and biogenesis, expressed under starvation conditions
181.m07942	-3.38911	CnGpa2
185.m02469	-3.19767	hypothetical protein
BCGP1-A14	-3.19499	SXI1 alpha
185.m02486	-3.10114	CFEM domain, CFEM proteins (e.g. Pth11 from M. grisea) are proposed to have important roles in fungal pathogenesis.
179.m00100	-3.09811	Ste14, protein-S-isoprenylcysteine O-methyltransferase= Prenylated protein carboxyl methyltransferase, maybe invovled in Mfa maturation
186.m03784	-2.91421	conserved hypothetical protein
163.m04754/1631.seq.052	-2.87483	hypothetical
180.m00014	-2.62924	scd1 protein in S.pombe, Required for mating and morphogenesis. May contain a cryptic binding site for cdc42 that is enhanced by binding Ras. Interacts directly with scd2. Promotes the exchange of cdc42-bound GDP by GTP. Involved in septation and stimulates the elongation of conjugation tubes.
186.m03785	-2.61183	conserved hypothetical protein
181.m08013	-2.56314	hypothetical
183.m01613	-2.50395	expressed pr
184.m05217	-2.40533	expressed pr
185.m02641	-2.12208	hypothetical protein
183.m01684	-1.94783	expressed
164.m02160	-1.89757	expressed, 1TM
181.m07928	-1.83677	alternative oxidase 1
185.m02645	-1.82857	lytic transglycosylase
183.m01614	-1.82797	expressed
183.m01810	-1.79947	expressed
180.m00336	-1.76604	chitin deacetylase
185.m02442	-1.72849	pyruvate decarboxylase
162.m02826	-1.67582	tartrate transporter
177.m03190	-1.52588	hypothetical
181.m08527	-1.44305	Myosin regulatory light chain cdc4
183.m01824	-1.43437	expressed
179.m00262	-1.42193	expressed protein, NLS,alternative sliced protein of 179.m00263
181.m08050	-1.38525	hypothetical
179.m00263	-1.3422	expressed protein, NLS,alternative sliced protein of 179.m00262
179.m00221	-1.33092	C-4 methyl sterol oxidase, ERG25
163.m02597/1633.seq.052	-1.30147	single strand binding pr. Family
184.m04362	-1.23871
184.m04377	-1.19492
189.m00030/1744.seq.117	-1.09358	hypothetical
180.m00222	-1.08589	putative MFS allantoate transporter
177.m03363	1.01566	expressed, 1TM
167.m03384	1.09179	hypothetical
179.m00031	1.09931	Hmp1, U.maydis, cruciform DNA binding protein
186.m03703	1.12683	expressed
177.m03398	1.16988	hypothetical
177.m03311	1.18141	expressed
190.m00046/1702.seq.061	1.27891	hypothetical
177.m03397	1.33367	hypothetical
163.m03852	1.37983	expressed
183.m01740	1.48044	Similar to Peripheral-type benzodiazepine receptor PBR, May play a role in the transport of porphyrins and heme.
177.m03264	1.58084	Hsp12
177.m02973	1.64481	laccase (EC 1.10.3.2) precursor
163.m06225	1.87778	PriA precursor
177.m03382	1.94236	laccase

## Sheet: mat2
note: yellow highlighted genes were also identified as differentially expressed genes in the mat2 mutants in JEC21 background during bilateral mating
Clone	Ln (mat2/WT)-4	annotation
163.m06343, 163.m06347, BCGP1-A6, 163.m06347, 1634.seq.014, BCGP1-A4, BCGP1-A5	-9.04735	MFalpha
BCGP1-A22, 163.m06349, BCGP1-A21, 1662.seq.055, BCGP1-A19, BCGP1-A20	-4.97576	STE3alpha
BCGP1-A14, 163.m06385, 163.m06386	-3.58874	SXI1 alpha
181.m08515	-4.51212	PriA protein precursor
163.m04754/1631.seq.052	-4.60587	hypothetical
179.m00576	-4.25516	Para-nitrobenzyl esterase
183.m01704	-4.04742	mutanase: alpha1,3-glucanases
179.m00100	-3.88189	Ste14, protein-S-isoprenylcysteine O-methyltransferase= Prenylated protein carboxyl methyltransferase, maybe invovled in Mfa maturation
163.m06183	-3.81172	hypothetical protein
185.m02486	-3.77596	CFEM domain, CFEM proteins (e.g. Pth11 from M. grisea) are proposed to have important roles in fungal pathogenesis.
1641.seq.139/ 164.m01516	-3.75986	sterol metabolism-related protein, Cytochrome b5-like Heme/Steroid binding domain
179.m00072	-3.72547	conserved hypothetical
177.m03060	-3.6921	Znf2
185.m02469	-3.65783	hypothetical protein
163.m06545	-3.15832	hypothetical
162.m02519	-3.11842	orphan nuclear receptor, NLS
181.m07942	-3.10329	CnGpa2
181.m07892	-3.07587	Crg1
186.m03862	-3.05833	pheromone receptor 1
179.m00263	-3.02295	expressed protein, NLS,alternative sliced protein of 179.m00262
179.m00262	-2.95163	expressed protein, NLS,alternative sliced protein of 179.m00263
163.m06193	-2.92525	hypothetical
163.m04754	-2.79966	hypothetical
164.m01417	-2.79639	mat2
164.m02802	-2.6808	hypothetical
180.m00305	-2.61599	plasma membrane fusion-related protein
186.m03961	-2.61549	cytochrome P450 hydroxylase
180.m00315	-2.59035	putative MFS allantoate transporter
163.m06189	-2.58053	hypothetical
163.m06426	-2.57288	PRY2,may be involved in cell wall organization and biogenesis, expressed under starvation conditions
184.m04573	-2.46768	conserved hypothetical protein
185.m02645	-2.36632	lytic transglycosylase
163.m02976	-2.32052	hypothetical protein, may have FAD binding domain, likely 2 TM
189.m00030/1744.seq.117	-2.20964	hypothetical
184.m04963	-2.19984	Serine-rich
179.m00594	-2.19462	hypothetical
186.m03521	-2.13392	Mating factor A secretion protein STE6
167.m05850	-2.08729	expressed
163.m06481	-2.07608	conserved hypothetical
177.m03470	-1.98722	hypothetical
184.m04792	-1.9674	hypothetical protein
181.m08013	-1.9439	hypothetical protein
179.m00167	-1.92373	RAS1
163.m06456,/1633.seq.035	-1.91949	hypothetical
162.m02826	-1.79152	tartrate transporter,
180.m00448	-1.78732	expressed
162.m04540	-1.76195	receptor-like kinase RHG4
185.m02650	-1.75788	vacuole protein
167.m03208/167.m05768	-1.74417	CPK1
183.m01810	-1.68391	expressed
163.m02597/1633.seq.052	-1.64933	single strand binding pr. Family
186.m03922	-1.60177	pum1
184.m04362	-1.50021	B2-aldehyde-forming enzyme
180.m00314	-1.46164	MFS allantoate transporter
181.m08527	-1.44707	Myosin regulatory light chain cdc4
179.m00179	-1.40654	conserved hypothetical
176.m02457	-1.37904	hypothetical
176.m02468	-1.37064	phosphatidylethanolamine binding protein Ovd1
185.m02717	-1.01263	cell wall surface anchor family protein
163.m06447	-0.876151	Gpb1
184.m05111	1.07147	conserved Spo12 family hypothetical protein
184.m05210	1.11253	conserved hypothetical protein
162.m04591	1.20497	Short chain 3-hydroxyacyl-CoA dehydrogenase
167.m03690	1.23195	transmembrane transporter Liz1p
163.m03823	1.28393	low-affinity zinc ion transporter
177.m02857	1.3152	MFS transporter
184.m04646	1.38096	hypothetical protein
180.m00020	1.41781	Multidrug resistance protein fnx1
162.m02760	1.48183	dihydrodipicolinate synthase
162.m02650	1.5028	ornithine-oxo-acid aminotransferase
162.m02849	1.50718	hypothetical
162.m02668/1621.seq.122	1.51581	vacuolar ATP synthase
162.m02814	1.57151	carboxypeptidase s
180.m00160	1.58257	Formate dehydrogenase
162.m02841	1.6013	Histone H1
180.m00061	1.65142	MFS allantoate transporter
162.m02730	1.68702	sterol-binding protein
162.m02698	1.72214	oxidoreductase
162.m02882	1.76791	putative potassium channel subunit
176.m02143	1.78388	beta-fructofuranosidase
162.m02915	1.83407	cytosine-purine permease
176.m02228	1.86894	endoribonuclease
162.m02999	1.91311	hypothetical, Zinc-Cys binuclear cluster
162.m02888	1.95112	phosphoenolpyruvate carboxykinase
183.m01801	1.95523	uridine permease
184.m04946	1.96281	Cytosine purine permease
162.m02722	1.99702	hypothetical protein
162.m02909	2.14149	endochitinase
162.m02790	2.17472	glycosyl-hydrolase
162.m02682	2.3516	haloacid dehalogenase

## Sheet: znf2
note: yellow highlighted genes were also identified as differentially expressed genes in the znf2 mutants in JEC21 background during bilateral mating
ID	Ln (znf2/WT)-4	comments
181.m08515	-2.88676	PriA protein precursor
177.m03060	-2.82675	Znf2
1641.seq.139/164.m01516	-2.73682	sterol metabolism-related protein, Cytochrome b5-like Heme/Steroid binding domain
163.m02976	-2.52651	hypothetical protein, may have FAD binding domain, likely 2 TM
180.m00111	-2.0491	conserved hypothetical protein
186.m03862	-1.59391	Cpr2
183.m01704	-1.5835	mutanase: alpha1,3-glucanases
184.m04573	-1.46542	conserved hypothetical protein
163.m06481	-1.40514	hypothetical protein
164.m01457	-1.38722	hypothetical protein, ATP synthase alpha and beta subunits signature. No homologs
179.m00263	-1.37879	expressed protein, NLS,alternative sliced protein of 179.m00262
179.m00262	-1.34114	expressed protein, NLS,alternative sliced protein of 179.m00263
179.m00594	-1.25097	hypothetical protein
BCGP1-A14/163.m06385/163.m06386	-1.19424	SXI1 alpha
163.m02597/1633.seq.052	-1.04826	single strand binding pr. Family
179.m00072	-1.01649	conserved hypothetical
184.m04963	-0.963298	serine rich
163.m06340	1.03586	hypothetical protein
179.m00031	1.17932	Hmp1, U.maydis, cruciform DNA binding protein
179.m00095	1.19694	Expressed protein
185.m02668	1.23894	conserved hypothetical protein, Ricin-type beta-trefoil lectin domain, Carbohydrate-binding domain
177.m03264	1.30429	Hsp12
162.m04526	1.35036	hypothetical protein
