# Supplementary material for: Transcription Factors Mat2 and Znf2 Operate Cellular Circuits Orchestrating Opposite- and Same-Sex Mating in Cryptococcus neoformans
Source: PLoS Genet. 2010 May 13;6(5):e1000953. doi: 10.1371/journal.pgen.1000953 (PMC2869318; doi:10.1371/journal.pgen.1000953)
Supplement: Table S4 — List of strains used in this study. (0.12 MB DOC) [file pgen.1000953.s009.doc]

**Table S4. Strains used in this study**

| **Strain name** | **Genotype** | **Source and comments** |
| --- | --- | --- |
| JEC21 | wild type | [116,117] |
| JEC20**a** | wild type | Congenic with JEC21 [116,117] |
| JEC169**a** 1 | *ade2 lys1 ura5* | [118] |
| RDC7**a** 1 | *ade2 cpk1::ADE2* | [4] |
| XL576 1 | *znf2*::*NATr* | this study |
| XL578 1 | *znf2*::*NATr* | this study |
| XL867**a** 1 | *znf2*::*NATr* | From a cross between JEC169**a** and XL578 |
| XL872 1 | *znf2*::*NATr ade2 lys1* | from a cross between JEC169**a** and XL576 |
| XL873 1 | *znf2*::*NATr ura5* | from a cross between JEC169**a** and XL576 |
| XL877 1 | *ade2* | from a cross between JEC169**a** and XL576 |
| XL878**a** 1 | *lys1* | from a cross between JEC169**a** and XL576 |
| XL874**a** 1 | *znf2*::*NATr* *lys1* | this study |
| XL875 1 | *znf2*::*NATr* *ade2* | this study |
| XL879**a** 1 | *znf2*::*NATr* | this study |
| XL910 1 | *znf2*::*NATr* *ZNF2-NEOr* | complementation of XL576 |
| XL978 1 | *znf2*::*NATr ura5* | 5-FOAr isolate of XL576 |
| XL1059**a** 1 | *znf2*::*NATr ura5* | 5-FOAr isolate of XL879 |
| XL1134 / 1 | *znf2*::*NATr znf2*::*NATr* | fusion product between XL872 with XL873 in the presence of JEC169. Diploid by FACS. |
| XL1131 1 | *ade2 cpk1::ADE2 znf2::NATr* | from a cross between RDC7 and XL576 |
| XL1127**a** 1 | *znf2::NATr ura5 URA5 PGPD1-SXI1α* | XL1059 transformed with pCH258 [39,40] that bears the *SXI1α* gene with the *GPD1* promoter. |
| XL926 1 | *mat2::NATr* | this study |
| XL961**a** 1 | *mat2::NEOr* | this study |
| XL975 1 | *mat2::NATr ura5* | 5-FOAr isolate of XL926 |
| XL1073 **a** 1 | *mat2::NEOr ura5* | 5-FOAr isolate of XL961 |
| XL1101 **a** 1 | *mat2::NATr ura5 URA5 PGPD1-SXI1* | XL1073 transformed with pCH258 [39,40] that bears the *SXI1α* gene with the *GPD1* promoter. |
| XL948 1 | *ste7::NATr* | this study |
| XL951**a** 1 | *ste7::NATr* | this study |
| XL984 1 | *ste7::NATr ura5* | 5-FOAr isolate of XL948 |
| XL1062**a** 1 | *ste7::NATr ura5* | 5-FOAr isolate of XL951 |
| XL1118**a** 1 | *ste7::**NATr ura5 URA5 PGPD1-SXI1α* | XL1062 transformed with pCH258 [39,40] that bears the *SXI1* gene with the *GPD1* promoter. |
| CFW5 1 | *ste12α:: NATr* | this study |
| MF5 1 | *ste12α:: NATr znf2:: NATr* | from a cross between CFW5 and XL867 |
| H99 | wild type | [119] |
| KN99 2 | wild type | Isogenic with H99 [31] |
| KN99**a** 2 | wild type | Congenic with H99/KN99α [31] |
| YSB119 2 | *aca1*::*NATr* *ura5* *ACA1-URA5* | [120] |
| YSB121**a** 2 | *aca1*::*NEOr* *ura5* *ACA1-URA5* | [120] |
| YSB345 2 | *ste7::NEOr* | From Y. S. Bahn |
| XL1598 2 | *mat2::NEOr* |  |
| XL1601 2 | *znf2*::*NEOr* | this study |
| XL1643 2 | *znf2*::*NEOr* *ZNF2-NATr* | complementation of XL1601 |
| XL280 | wild type | [35] |
| XL574 3 | *znf2*::*NATr* | this study |
| XL904 3 | *znf2*::*NATr* *ZNF2-NEOr* | complementation of XL574 |
| XL942 3 | *mat2::NATr* | this study |
| XL967 3 | *mat2::NATr ura5* | 5-FOAr isolate of XL942 |
| XL946 3 | *ste7::NATr* | this study |
| XL993 3 | *ste7::NATr ura5* | 5-FOAr isolate of XL946 |
| CFW4 3 | *ste12*α::*NATr* | this study |
| XL254**a** | wild type | [35] |
| XL575**a** 4 | *znf2*::*NATr* | this study |
| XL900**a** 4 | *znf2*::*NATr* *ZNF2-NEOr* | complementation of XL575 |
| XL987**a** 4 | *znf2*::*NATr ura5* | 5-FOAr isolate of XL575 |
| XL187**a** | wild type | [35] |
| XL1445**a** 5 | *znf2*::*NATr* | this study |
| XL304 | wild type | [35] |
| XL1447 6 | *znf2*::*NATr* | this study |

1: Strains in JEC21/JEC20 background (serotype D)

2: Strains in H99 background (serotype A)

3: Strains in XL280 background (serotype D)

4: Strains in XL254 background (serotype D)

5: Strains in XL187 background (serotype D)

6: Strains in XL304 background (serotype D)
